# Supplementary material
Source: PubMed Central journal article supplement (PMC3232614)

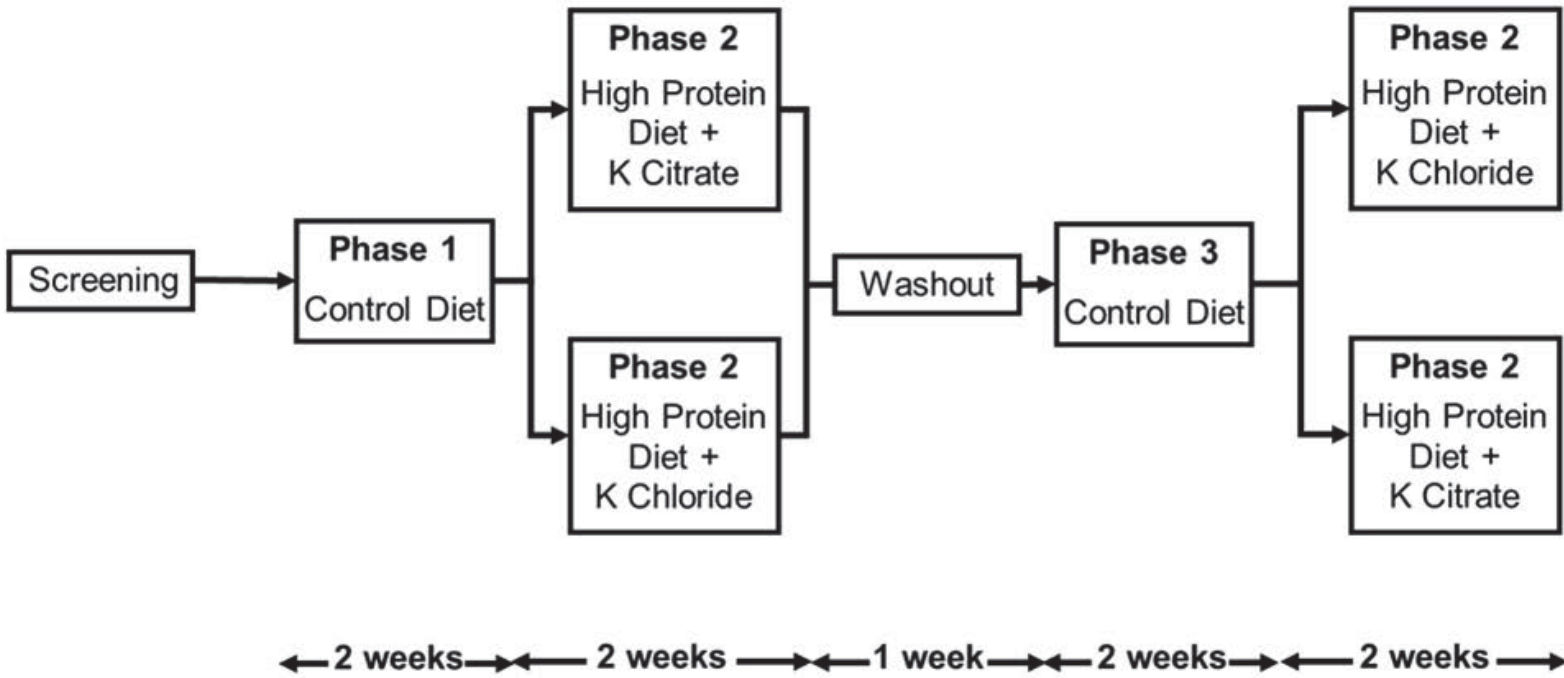

Supplement: supp_jc.2011-1531_11-1531_Fig_1.pdf [file supp_jc.2011-1531_11-1531_Fig_1.pdf]
